# Supplementary material for: A highly flexible and conductive graphene-wrapped carbon nanofiber membrane for high-performance electrocatalytic applications
Source: Royal Society of Chemistry journal article supplement (doi:10.1039/c6qi00101g), 2016-01-01
Supplement: c6qi00101g1.pdf [file c6qi00101g1.pdf]

## Supporting Information

### **A highly flexible and conductive graphene-wrapped carbon nanofiber membrane for high-performance electrocatalytic applications**

*Yunpeng Huang, Longsheng Zhang, Hengyi Lu, Feili Lai, Yue-E Miao\*, Tianxi Liu\**

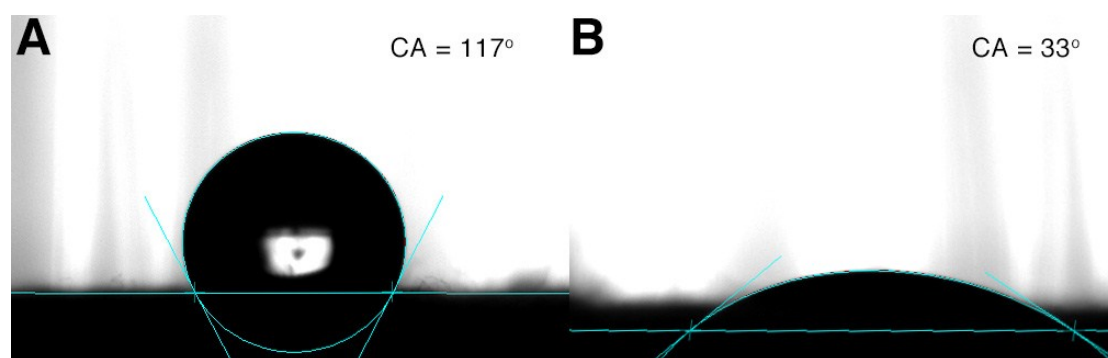

**Fig. S1** Contact angle measurements of PAN (A) and oPAN (B) nanofibrous membranes.

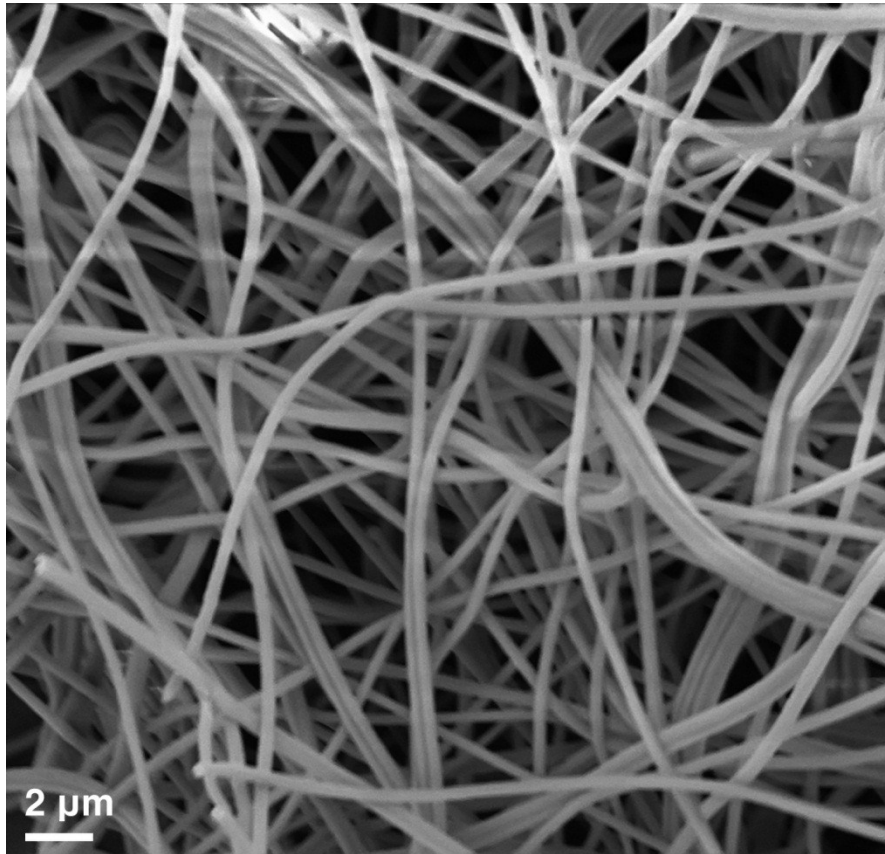

**Fig. S2** SEM image of the oPAN nanofibrous membrane showing high porosity.

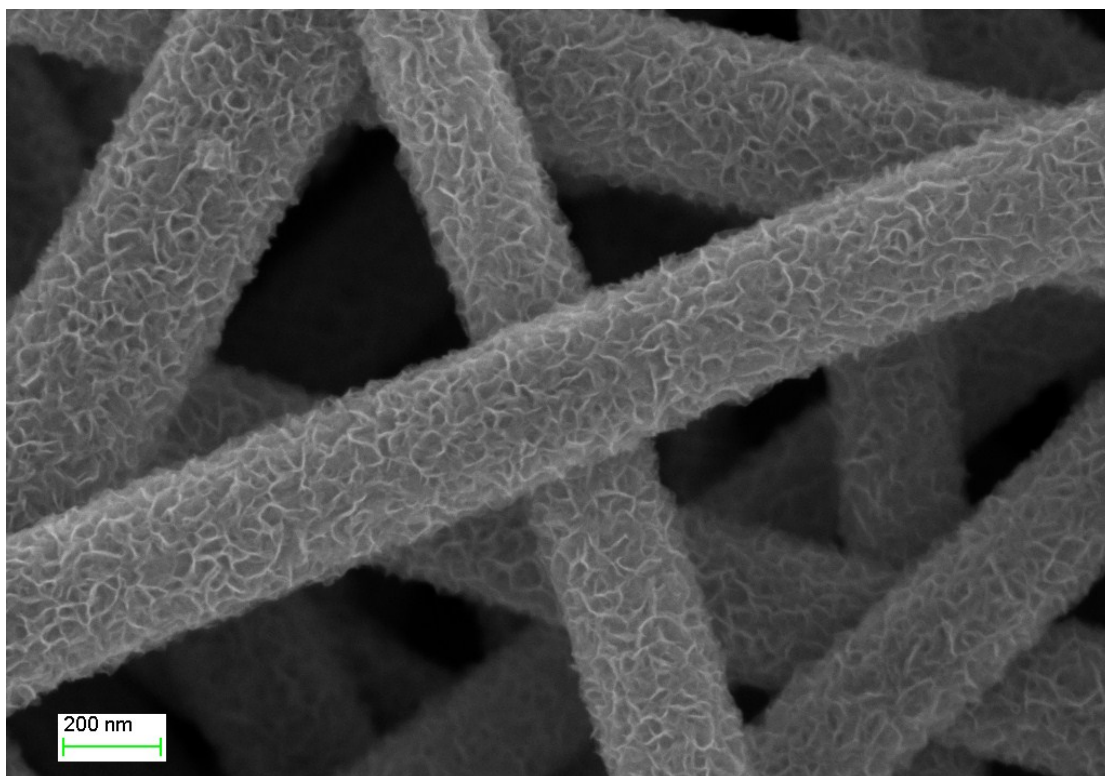

**Fig. S3** SEM image of CNF-MoSe<sub>2</sub> composite prepared (with the absence of graphene wrapping) under the same condition as the GwC-MoSe<sub>2</sub>-3 composite.

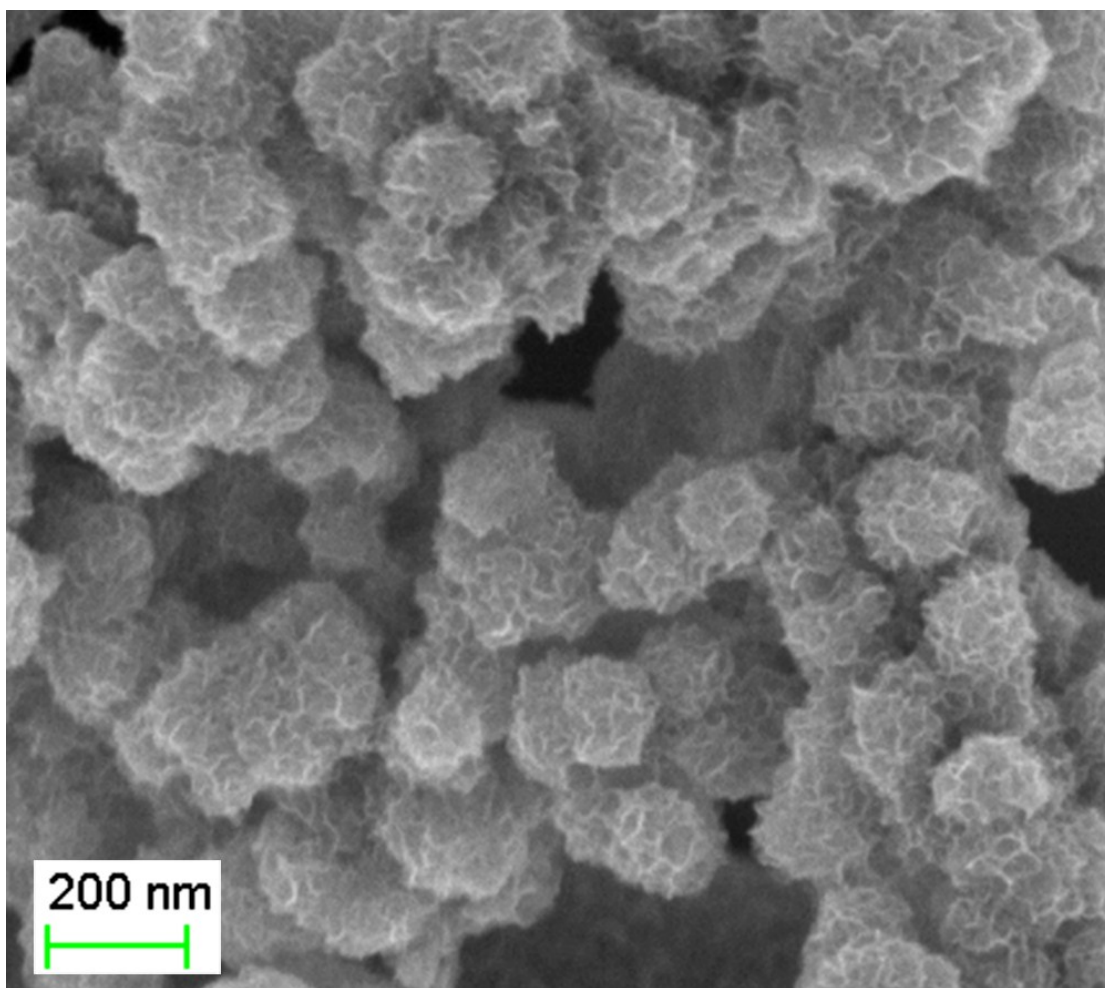

**Fig. S4** SEM image of pure MoSe<sub>2</sub> aggregates prepared at the absence of GwC, which shows wrinkled and spherical morphology.
